# Supplementary material
Source: publisher figshare collection journal article supplement (https://frontiersin.figshare.com/ndownloader/files/28216770)
Supplement: Supplementary file [file 28216770]

## Supplementary Material

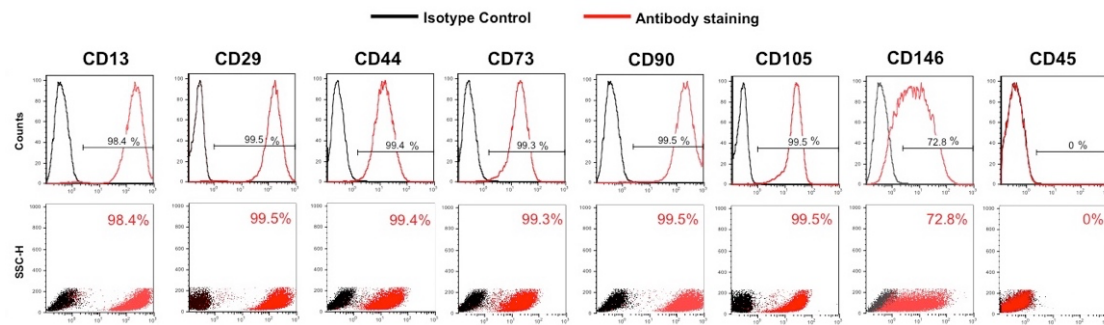

**Supplementary Figure 1:** Immunophenotype analysis of CD13, CD29, CD44, CD73, CD90, CD105, CD146 and CD45 expression in DFPCs at passage 2 by flow cytometry.

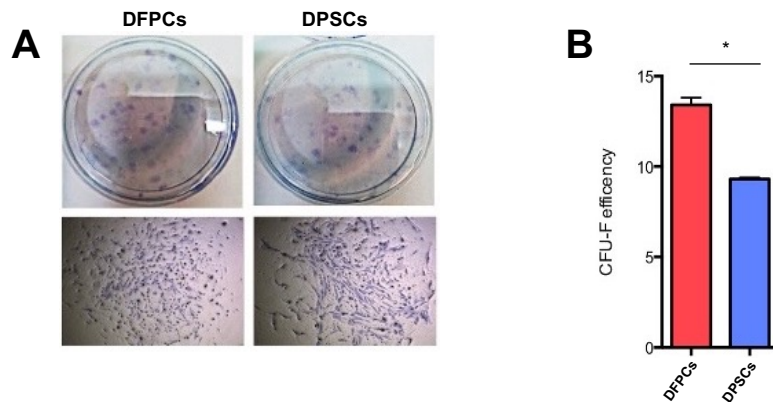

**Supplementary Figure 2.** Characterization of dental stem cells (DSCs): A) CFU-F (fibroblast colony-forming units). B) Quantification of CFU-F in DSCs.

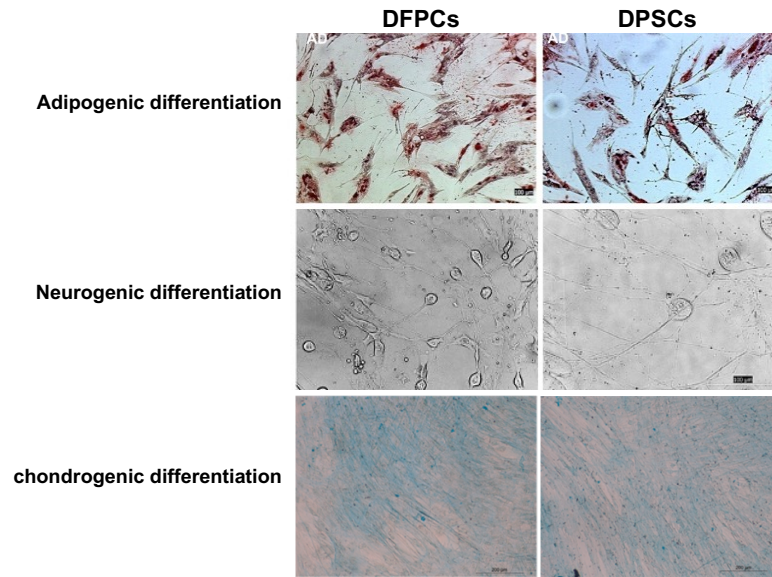

**Supplementary Figure 3:** Multilineage differentiation potential of DFPCs and DPSCs.

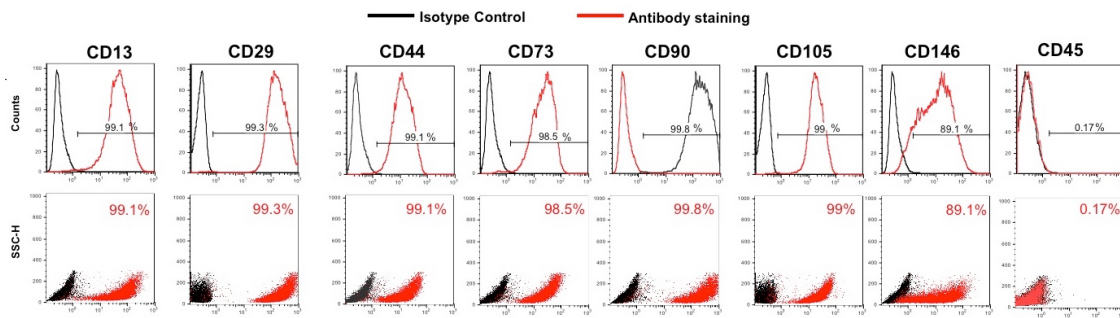

**Supplementary Figure 4:** Immunophenotype analysis of CD13, CD29, CD44, CD73, CD90, CD105, CD146 and CD45 expression in DPSCs at passage 2 by flow cytometry.

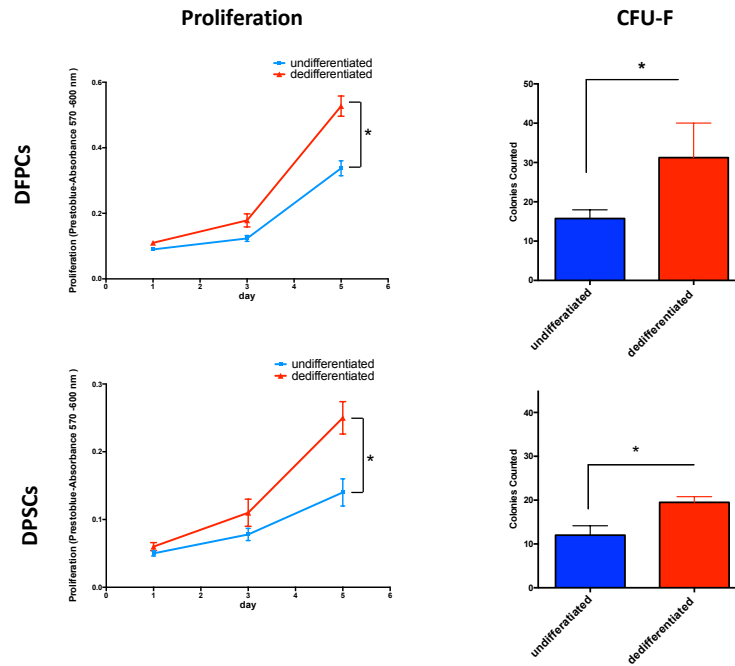

**Supplementary Figure 5:** Cell proliferation assay and CFU-F assay for Dediff-DFPCs and Dediff-DPSCs. Values were indicated statistically significant when \* $P < 0.05$ .
